# Supplementary material for: Support effects on SILP hybrid catalysts prepared with carbon materials and the RhCOD complex
Source: Royal Society of Chemistry journal article supplement (doi:10.1039/c6ra22213g), 2016-01-01
Supplement: c6ra22213g1.pdf [file c6ra22213g1.pdf]

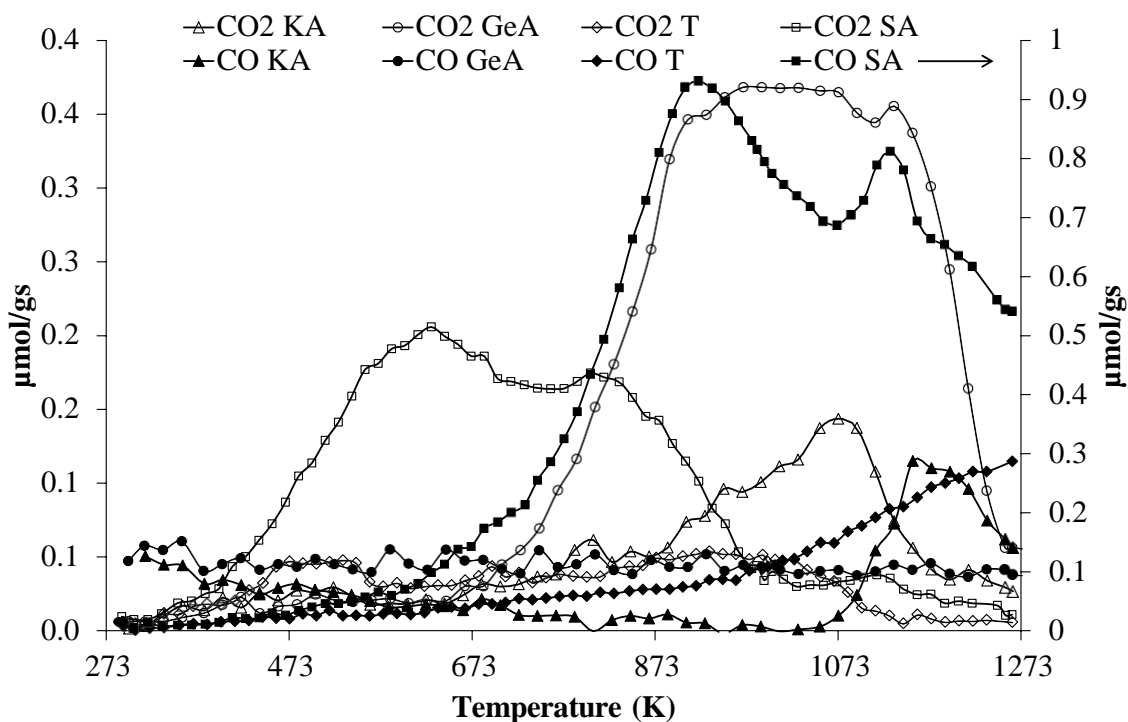

Figure S1. CO<sub>2</sub> and CO evolution in TPD experiments carried out with the carbon materials used as support

Details of the parameters used in GC analysis are:

Oven temperature : 313 K  
Injector temperature : 423 K  
Detector temperature: 523 K  
Heating program: 313 K, 2 min, and then heating at 75 K/min up to 423 K, 7 min.  
Air flow: 450 mL/min, H<sub>2</sub> flow: 150 mL/min  
Column flow: 1.3 mL/min  
Injected volume: 1 μL  
Retention time:  
-cyclohexane -- 3.0 min  
-cyclohexene -- 3.1 min  
- decane – 5.9 min
